# Supplementary material
Source: PubMed Central journal article supplement (PMC1459335)
Supplement: NIHMS5601-supplement-appendix.pdf [file NIHMS5601-supplement-appendix.pdf]

Appendix:

Children's Cancer Group Participating Institutions and Investigators

| Institution                                                       | City                     | Investigator               | Grant No.   |
|-------------------------------------------------------------------|--------------------------|----------------------------|-------------|
| A.B. Chandler Medical Center–<br>University of Kentucky           | Lexington, KY            | Martha Greenwood           | N/A         |
| Akron City Hospital                                               | Akron, OH                |                            | N/A         |
| Albany Medical Center                                             | Albany, NY               | Jennifer Pearce            | N/A         |
| Albert Einstein Medical Center                                    | Philadelphia, PA         |                            | N/A         |
| Allan Blair Cancer Centre                                         | Regina, SK,<br>Canada    | Ten Goh                    | N/A         |
| Atlantic Health System                                            | Summit, NJ               | Hazem Mahmoud              | N/A         |
| Baystate Medical Center                                           | Springfield, MA          | David Steele               | N/A         |
| Bellin Memorial Hospital                                          | Green Bay, WI            |                            | N/A         |
| British Columbia's Children's Hospital                            | Vancouver, BC,<br>Canada | Paul Rogers                | CA<br>29013 |
| Brookdale Hospital Medical Center                                 | Brooklyn, NY             | Kusum<br>Viswanathan       | N/A         |
| Brooklyn Hospital Center                                          | Brooklyn, NY             | Swayamprabha<br>Sadanandan | N/A         |
| C.S. Mott Children's Hospital                                     | Ann Arbor, MI            | Raymond<br>Hutchinson      | CA<br>02971 |
| Cabell Huntington Hospital                                        | Huntington, WV           | Andrew Pendleton           | N/A         |
| CancerCare Manitoba                                               | Winnipeg, MB,<br>Canada  | Rochelle Yanofsky          | N/A         |
| Cardinal Glennon Childrens Hospital                               | St Louis, MO             |                            | N/A         |
| Cedars-Sinai Medical Center                                       | Los Angeles, CA          | Carole Hurvitz             | N/A         |
| Childhood Hematology/Oncology<br>Associates and Memorial Hospital | Colorado Springs,<br>CO  |                            | N/A         |
| Children's Health Care–Minneapolis                                | Minneapolis, MN          | Maura O'Leary              | N/A         |
| Children's Healthcare of Atlanta at<br>Scottish Rite              | Atlanta, GA              | Stephen Lauer              | CA<br>20549 |
| Children's Hematology/Oncology Team                               | Lubbock, TX              | John Iacuone               | N/A         |

at Covenant Children's Hospital

|                                                              |                         |                       |             |
|--------------------------------------------------------------|-------------------------|-----------------------|-------------|
| Children's Hospital at the Medical Center of Central Georgia | Macon, GA               | Hassan Dannawi        | N/A         |
| Children's Hospital and Regional Medical Center              | Seattle, WA             | Douglas Hawkins       | N/A         |
| Children's Hospital, Central California                      | Fresno, CA              | Vonda Crouse          | N/A         |
| Children's Hospital of Austin                                | Austin, TX              | Sharon Lockhart       | N/A         |
| Children's Hospital of Pittsburgh                            | Pittsburgh, PA          | Kim A. Ritchey        | N/A         |
| Children's Hospitals and Clinics--St Paul                    | St Paul, MN             | Christopher Moertel   | N/A         |
| Children's Medical Center--Dayton                            | Dayton, OH              | Emmett Broxson        | N/A         |
| Children's National Medical Center--DC                       | Washington, DC          | Nita Seibel           | N/A         |
| Childrens Hospital, Los Angeles                              | Los Angeles, CA         | Paul Gaynon           | N/A         |
| Childrens Hospital Medical Center, Cincinnati                | Cincinnati, OH          | John Perentesis       | CA<br>02649 |
| Childrens Hospital Medical Center--Akron, OH                 | Akron, OH               | Jeffrey Hord          | N/A         |
| Childrens Hospital, Oakland                                  | Oakland, CA             | James Feusner         | N/A         |
| Childrens Hospital of Columbus                               | Columbus, OH            | Amanda Termuhlen      | N/A         |
| Childrens Hospital of Orange County                          | Orange, CA              | Violet Shen           | N/A         |
| Childrens Hospital of Philadelphia                           | Philadelphia, PA        | Beverly Lange         | N/A         |
| Childrens Hospital of Western Ontario                        | London, ON,<br>Canada   | Elizabeth Cairney     | CA<br>11796 |
| Childrens Hospital of Winnipeg                               | Winnipeg, MB,<br>Canada |                       | N/A         |
| Childrens Hospital--King's Daughters                         | Norfolk, VA             | Rebecca Byrd          | N/A         |
| Childrens Memorial Hospital of Omaha                         | Omaha, NE               | Minnie<br>Abromowitch | N/A         |
| Christiana Care Health Services/A.I. duPont Institute        | Wilmington, DE          | Gregory Griffin       | N/A         |
| Christiana Hospital                                          | Wilmington, DE          |                       | N/A         |
| City of Hope National Medical Center                         | Duarte, CA              | Judith Sato           | N/A         |
| Clarian Health                                               | Indianapolis, IN        |                       | N/A         |
| Columbia Medical Center--West                                | El Paso, TX             |                       | N/A         |

|                                                                     |                           |                   |             |
|---------------------------------------------------------------------|---------------------------|-------------------|-------------|
| Columbia Presbyterian College of Physicians and Surgeons            | New York, NY              | Linda Granowetter | N/A         |
| Connecticut Children's Medical Center                               | Farmington, CT            | Arnold Altman     | N/A         |
| Cooper Hospital/University Medical Center                           | Camden, NJ                |                   | N/A         |
| Cooper Hospital/University Medical Center                           | Camden, NJ                |                   | N/A         |
| Dakota Clinic                                                       | Fargo, ND                 | Janet Tillisch    | N/A         |
| Dakota Midwest Cancer Institute                                     | Sioux Falls, SD           | Marwan Hanna      | N/A         |
| David Grant United States Air Force Medical Center                  | Travis Air Force Base, CA | Peter Chenaille   | N/A         |
| Deaconess Medical Center                                            | Spokane, WA               | Frank Reynolds    | N/A         |
| DeVos Children's Hospital                                           | Grand Rapids, MI          | David Freyer      | N/A         |
| Doernbecher Childrens Hospital–Oregon University Health and Science | Portland, OR              | H. Nicholson      | N/A         |
| Duluth Clinic                                                       | Duluth, MN                | Jacquelyn Wiermaa | N/A         |
| East Tennessee Childrens Hospital                                   | Knoxville, TN             | Ray Pais          | N/A         |
| Fort Sanders Presbyterian                                           | Knoxville, TN             |                   | N/A         |
| Fred Hutchinson Cancer Research Center                              | Seattle, WA               |                   | N/A         |
| Geisinger Medical Center                                            | Danville, PA              | Jeffrey Taylor    | N/A         |
| Georgetown University Medical Center                                | Washington, DC            | Aziza Shad        | N/A         |
| Group Health Cooperative                                            | Seattle, WA               | Philip Herzog     | N/A         |
| Gundersen Lutheran                                                  | La Crosse, WI             | Robert Ettinger   | N/A         |
| Henry Ford Hospital                                                 | Detroit, MI               |                   | N/A         |
| Huntington Memorial Hospital                                        | Pasadena, CA              |                   | N/A         |
| Indiana University–Riley Childrens Hospital                         | Indianapolis, IN          | Robert Fallon     | CA<br>13809 |
| IWK Health Centre                                                   | Halifax, NS,<br>Canada    | Dorothy Barnard   | N/A         |
| Janeway Child Health Center                                         | St. John's, NF,<br>Canada | John (Jack) Hand  | N/A         |
| Kaiser Permanente–Northwest Region                                  | Portland, OR              |                   | N/A         |
| Kaiser Permanente Medical Group, Inc, Northern California           | Oakland, CA               | Kenneth Leung     | N/A         |

|                                                                               |                         |                         |             |
|-------------------------------------------------------------------------------|-------------------------|-------------------------|-------------|
| Kalamazoo Center for Medical Studies                                          | Kalamazoo, MI           | Leonard Mattano,<br>Jr. | N/A         |
| Kosair Childrens Hospital                                                     | Louisville, KY          | Salvatore Bertolone     | N/A         |
| Loma Linda University Medical Center                                          | Loma Linda, CA          | Antranik Bedros         | N/A         |
| Loyola University Medical Center                                              | Maywood, IL             | Ricarchito Manera       | N/A         |
| Lutheran General Childrens Medical<br>Center                                  | Park Ridge, IL          | Jong-Hyo Kwon           | N/A         |
| M.D. Anderson Cancer Center                                                   | Houston, TX             | Joann Ater              | CA<br>55362 |
| Maimonides Medical Center                                                     | Brooklyn, NY            | Ludovico Guarini        | N/A         |
| Marshfield Clinic                                                             | Marshfield, WI          | Michael McManus         | N/A         |
| Mary Bridge Hospital                                                          | Tacoma, WA              | William Thomas          | N/A         |
| Mayo Clinic and Foundation                                                    | Rochester, MN           | Carola Arndt            | CA<br>28882 |
| Medical College of Georgia Childrens<br>Medical Center                        | Augusta, GA             | Roger Vega              | N/A         |
| Memorial Hospital                                                             | Colorado Springs,<br>CO |                         | N/A         |
| Memorial Medical Center/Backus<br>Children's Hospital                         | Savannah, GA            | Ihsan Al-Khalil         | N/A         |
| Memorial Miller Children's Hospital at<br>LBMMC                               | Long Beach, CA          |                         | N/A         |
| Memorial Sloan-Kettering Cancer Center                                        | New York, NY            | Peter Steinherz         | CA<br>42764 |
| Mercy Children's Hospital                                                     | Toledo, OH              | Rama Jasty              | N/A         |
| MeritCare Hospital                                                            | Fargo, ND               | Nathan Kobrinsky        | N/A         |
| MetroHealth Medical Center                                                    | Cleveland, OH           |                         | N/A         |
| Michigan State University                                                     | East Lansing, MI        | Renuka Gera             | N/A         |
| Miller Children's Hospital/Harbor-<br>University of California at Los Angeles | Long Beach, CA          | W. Roberts              | CA<br>14560 |
| Monmouth Medical Center                                                       | Long Branch, NJ         |                         | N/A         |
| Montefiore Medical Center                                                     | Bronx, NY               | Eva Radel               | N/A         |
| Morristown Memorial Hospital                                                  | Morristown, NJ          |                         | N/A         |
| Mountain States Tumor Institute                                               | Boise, ID               | J. Johnston             | N/A         |

|                                                        |                           |                   |             |
|--------------------------------------------------------|---------------------------|-------------------|-------------|
| New York Hospital–Cornell University Medical Center    | New York, NY              | Patricia Giardina | N/A         |
| New York Medical College                               | Valhalla, NY              | Fevzi Ozkaynak    | N/A         |
| New York University Medical Center                     | New York, NY              | Aaron Rausen      | CA<br>79753 |
| Newark Beth Israel Medical Center                      | Newark, NJ                | Peri Kamalakar    | N/A         |
| Northside Hospital                                     | GA                        |                   | N/A         |
| PCHTN Tissue Bank                                      | Columbus, OH              |                   | N/A         |
| Penn State Children’s Hospital, Hershey Medical Center | Hershey, PA               | John Neely        | N/A         |
| Phoenix Childrens Hospital                             | Phoenix, AZ               | Paul Baranko      | N/A         |
| Presbyterian/St Lukes Medical Center and CHOA          | Denver, CO                | Patricia Cullen   | N/A         |
| Primary Childrens Medical Center                       | Salt Lake City, UT        | Carol Bruggers    | N/A         |
| Princess Margaret Hospital for Children                | Perth, WA,<br>Australia   | Marianne Phillips | N/A         |
| Providence Memorial Hospital-El Paso                   | El Paso, TX               |                   | N/A         |
| Quain and Ramstad Clinic                               | Bismarck, ND              |                   | N/A         |
| Rainbow Babies and Childrens Hospital                  | Cleveland, OH             | Eric Kodish       | N/A         |
| Raymond Blank Children’s Hospital                      | Des Moines, IA            | Torrey Mitchell   | N/A         |
| Rush Presbyterian–St Lukes Medical Center              | Chicago, IL               |                   | N/A         |
| Saint Barnabas Medical Center                          | Livingston, NJ            | Brenda Sison      | N/A         |
| Saint John Regional Hospital                           | Saint John, NF,<br>Canada |                   | N/A         |
| Santa Barbara Cottage Children’s Hospital              | Santa Barbara, CA         | Felicity Hodder   | N/A         |
| Saskatoon Cancer Center                                | Saskatoon, SK,<br>Canada  | Kaiser Ali        | N/A         |
| Schneider Children’s Hospital at North Shore           | Manhasset, NY             | Arlene Redner     | N/A         |
| Sinai Hospital of Baltimore                            | Baltimore, MD             | Joseph Wiley      | N/A         |
| Sioux Valley Children’s Specialty Clinics              | Sioux Falls, SD           | Jakica Tancabelic | N/A         |
| South Carolina Cancer Center                           | Columbia, SC              | Ronnie Neuberg    | N/A         |

|                                                                 |                          |                     |             |
|-----------------------------------------------------------------|--------------------------|---------------------|-------------|
| Southern California Permanente Medical Group                    | Downey, CA               | Willye Powell       | N/A         |
| Southern Illinois University School of Medicine                 | Springfield, IL          | Gregory Brandt      | N/A         |
| Southwest Cancer Center–Texas Tech/Lubbock                      | Lubbock, TX              |                     | N/A         |
| Southwest Texas Methodist Hospital                              | San Antonio, TX          | Jaime Estrada       | N/A         |
| St Joseph’s Hospital and Medical Center                         | Paterson, NJ             | Mary Ann Bonilla    | N/A         |
| St Lukes Hospital Medical Center                                | New York, NY             |                     | N/A         |
| St Mary’s Hospital (Dean Medical Center)                        | Madison, WI              |                     | N/A         |
| St Vincent Children’s Hospital–Indiana                          | Indianapolis, IN         | Randy Hock          | N/A         |
| St Vincent Hospital                                             | Green Bay, WI            |                     | N/A         |
| Starship Children’s Hospital                                    | Auckland, New Zealand    | Lochie Teague       | N/A         |
| Staten Island University Hospital                               | Staten Island, NY        |                     | N/A         |
| Sunrise Childrens Hospital, Sunrise Hospital and Medical Center | Las Vegas, NV            | Paul Kent           | N/A         |
| State University of New York Health Science Center at Brooklyn  | Brooklyn, NY             | Sreedhar Rao        | N/A         |
| Sydney Children’s Hospital                                      | Randwick, NSW, Australia | Glenn Marshall      | N/A         |
| Texas Tech Regional Academic Health Center                      | El Paso, TX              |                     | N/A         |
| Texas Tech UHSC–Amarillo                                        | Amarillo, TX             | Curtis Turner       | N/A         |
| The Children’s Hospital–Denver, CO                              | Denver, CO               | Roger Giller        | N/A         |
| The Children’s Hospital at The Cleveland Clinic                 | Cleveland, OH            | Joanne Hilden       | N/A         |
| The Childrens Mercy Hospital                                    | Kansas City, MO          | Maxine Hetherington | N/A         |
| Toledo Children’s Hospital                                      | Toledo, OH               | Richard Shore       | N/A         |
| Toronto                                                         |                          |                     | N/A         |
| Tulane University Medical School                                | New Orleans, LA          |                     | N/A         |
| University of California at Los Angeles School of Medicine      | Los Angeles, CA          | Stephen Feig        | CA<br>27678 |

|                                                                        |                         |                         |             |
|------------------------------------------------------------------------|-------------------------|-------------------------|-------------|
| University of California at San Francisco School of Medicine           | San Francisco, CA       | Katherine Matthay       | CA<br>17829 |
| United Hospitals Medical Center                                        | NJ                      |                         | N/A         |
| University of California, Irvine                                       | Orange, CA              | Stanley<br>Calderwood   | N/A         |
| University of Chicago Medical Center                                   | Chicago, IL             | James Nachman           | N/A         |
| University of Illinois                                                 | Chicago, IL             | Mary Schmidt            | N/A         |
| University of Illinois–Rockford                                        | Rockford, IL            |                         | N/A         |
| University of Iowa Hospitals and Clinics                               | Iowa City, IA           | Raymond Tannous         | N/A         |
| University of Manitoba                                                 | Manitoba, MB,<br>Canada |                         | N/A         |
| University of Medicine and Dentistry of New Jersey                     | New Brunswick,<br>NJ    | Richard Drachtman       | N/A         |
| University of Minnesota Cancer Center                                  | Minneapolis, MN         | Joseph Neglia           | CA<br>07306 |
| University of Nebraska Medical Center                                  | Omaha, NE               | Peter Coccia            | N/A         |
| University of North Carolina at Chapel Hill                            | Chapel Hill, NC         | Stuart Gold             | N/A         |
| University of Virginia Childrens Medical Center                        | Charlottesville, VA     |                         | N/A         |
| University of Wisconsin–Childrens Hospital Madison                     | Madison, WI             | Yousif (Joe)<br>Matloub | N/A         |
| United States Air Force Medical Center–Wright Patterson Air Force Base | OH                      |                         | N/A         |
| Vanderbilt Children’s Hospital                                         | Nashville, TN           | James Whitlock          | CA<br>26270 |
| Western Reserve Care System–Tod Childrens Hospital                     | Youngstown, OH          | Ayman Saleh             | N/A         |
| William Beaumont Hospital                                              | Royal Oak, MI           | Charles Main            | N/A         |
| Women’s and Children’s Hospital in San Antonio                         | San Antonio, TX         |                         | N/A         |
| Women’s and Children’s Pavillion at University of Southern California  | Los Angeles, CA         |                         | N/A         |
| Wright State University                                                | Dayton, OH              |                         | N/A         |

Abbreviation: N/A, not applicable.
